# Supplementary material for: In Vitro Evaluation of a Phage Cocktail Controlling Infections with Escherichia coli
Source: MDPI journal article supplement (doi:10.3390/v12121470), 2020-12-19

# 1 Supplementary Materials

2

3 **Table S1:** *E. coli* strains used for phage isolation, characterization and propagation (<sup>NT</sup> = non motile,

4 <sup>NT</sup> = non-typeable, ND = no data, risk group = RG, + = positiv, - = negative)

| strain designation | origin      | date of isolation | geographical origin | serotype                   | remarks                                                       |
|--------------------|-------------|-------------------|---------------------|----------------------------|---------------------------------------------------------------|
| DSM 498 (K12)      | ND          | ND                | ND                  | O16:H48                    | laboratory strain, RG 1                                       |
| DSM 613 (B)        | ND          | ND                | ND                  | O7:H <sup>NT</sup>         | laboratory strain, RG 1                                       |
| DSM 6897 (DH5α)    | ND          | ND                | ND                  | ND                         | laboratory strain, λ <sup>(-)</sup> , RG 1                    |
| DSM 18039 (MG1655) | ND          | ND                | ND                  | ND                         | laboratory strain, F <sup>(-)</sup> , λ <sup>(-)</sup> , RG 1 |
| DSM 101101         | human urine | 25-09-2016        | Germany             | O25:H4                     | ESBL, RG 2                                                    |
| DSM 101102         | human       | 25-09-2016        | Germany             | O102:H <sup>NT</sup>       | ESBL, RG 2                                                    |
| DSM 101103         | human       | 25-09-2016        | Germany             | O <sup>NT</sup> :H4        | ESBL, RG 2                                                    |
| DSM 101104         | human urine | 29-09-2015        | Germany             | O7:H5                      | ESBL, RG 2                                                    |
| DSM 101105         | human       | 29-09-2015        | Germany             | O <sup>NT</sup> :H4        | ESBL, RG 2                                                    |
| DSM 101106         | human urine | 28-09-2015        | Germany             | O75:H9 var. 7              | ESBL, RG 2                                                    |
| DSM 101107         | human urine | 28-09-2015        | Germany             | O <sub>rough</sub> :H6     | ESBL, RG 2                                                    |
| DSM 101108         | human urine | 30-09-2015        | Germany             | O25:H4                     | ESBL, RG 2                                                    |
| DSM 101109         | human urine | 30-09-2015        | Germany             | O25:H4                     | ESBL, RG 2                                                    |
| DSM 101110         | human       | 01-10-2015        | Germany             | O <sup>NT</sup> :H9 var. 7 | ESBL, RG 2                                                    |
| DSM 101111         | human       | 01-10-2015        | Germany             | O25:H4                     | ESBL, RG 2                                                    |
| DSM 101112         | human       | 01-10-2015        | Germany             | O25:H4                     | ESBL, RG 2                                                    |
| DSM 101113         | human       | 18-09-2015        | Germany             | O25:H4                     | ESBL, RG 2                                                    |
| DSM 101114         | human       | 22-09-2015        | Germany             | O25:H4                     | ESBL, RG 2                                                    |
| DSM 101115         | human       | 23-09-2015        | Germany             | O75:H9 var. 7              | ESBL, RG 2                                                    |
| DSM 101116         | human       | 24-09-2015        | Germany             | O <sup>NT</sup> :H15       | ESBL, RG 2                                                    |
| DSM 101117         | human urine | 11-09-2015        | Germany             | O25:H4                     | ESBL, RG 2                                                    |
| DSM 101118         | human       | 12-09-2015        | Germany             | O25:H4                     | ESBL, RG 2                                                    |
| DSM 101120         | human       | 17-09-2015        | Germany             | O25:H4                     | ESBL, RG 2                                                    |
| DSM 101121         | human       | 09-09-2015        | Germany             | O <sup>NT</sup> :H1        | ESBL, RG 2                                                    |
| DSM 101122         | human       | 10-09-2015        | Germany             | O7:H5                      | ESBL, RG 2                                                    |
| DSM 101123         | human       | 10-09-2015        | Germany             | O7:H5                      | ESBL, RG 2                                                    |
| DSM 101124         | human urine | 29-08-2015        | Germany             | O <sup>NT</sup> :H15       | ESBL, RG 2                                                    |
| DSM 101125         | human       | 28-08-2015        | Germany             | O <sup>NT</sup> :H9 var. 7 | ESBL, RG 2                                                    |
| DSM 101126         | human urine | 29-08-2015        | Germany             | O75:H9 var. 7              | ESBL, RG 2                                                    |
| DSM 101127         | human       | 02-09-2015        | Germany             | O25:H4                     | ESBL, RG 2                                                    |
| DSM 101128         | human       | 02-09-2015        | Germany             | O25:H4                     | ESBL, RG 2                                                    |
| DSM 101129         | human urine | 03-09-2015        | Germany             | O25:H4                     | ESBL, RG 2                                                    |
| DSM 101131         | human urine | 22-08-2015        | Germany             | O25:H4                     | ESBL, RG 2                                                    |
| DSM 101132         | human       | 22-08-2015        | Germany             | O <sub>rough</sub> :H4     | ESBL, RG 2                                                    |
| DSM 101133         | human       | 22-08-2015        | Germany             | O <sup>NT</sup> :H18       | ESBL, RG 2                                                    |
| DSM 101134         | human urine | 23-08-2015        | Germany             | O7:H5                      | ESBL, RG 2                                                    |
| DSM 101135         | human urine | 23-08-2015        | Germany             | O25:H4                     | ESBL, RG 2                                                    |
| DSM 101136         | human urine | 23-08-2015        | Germany             | O25:H4                     | ESBL, RG 2                                                    |
| DSM 101137         | human       | 23-08-2015        | Germany             | O <sup>NT</sup> :H18       | ESBL, RG 2                                                    |
| DSM 101138         | human       | 27-08-2015        | Germany             | O1:H6                      | ESBL, RG 2                                                    |
| DSM 101139         | human       | 24-08-2015        | Germany             | O1:H6                      | ESBL, RG 2                                                    |

|                     |                        |            |             |                        |                                                                                                               |
|---------------------|------------------------|------------|-------------|------------------------|---------------------------------------------------------------------------------------------------------------|
| DSM 101140          | human                  | 24-08-2015 | Germany     | O <sup>NT</sup> :H6    | ESBL, RG 2                                                                                                    |
| DSM 101141          | human                  | 23-08-2015 | Germany     | O15:H1                 | ESBL, RG 2                                                                                                    |
| DSM 101142          | human                  | 27-08-2015 | Germany     | O <sup>NT</sup> :H4    | ESBL, RG 2                                                                                                    |
| DSM 103242<br>(E07) | chicken<br>carcass     | 17-09-2012 | Netherlands | O138:H48               | ESBL, RG 2                                                                                                    |
| DSM 103243<br>(E08) | chicken<br>carcass     | 17-09-2012 | Netherlands | O25:H48                | ESBL, RG 2                                                                                                    |
| DSM 103244<br>(E17) | chicken<br>carcass     | 17-09-2012 | Belgium     | O38:H39                | ESBL, RG 2                                                                                                    |
| DSM 103245<br>(E18) | chicken<br>carcass     | 17-09-2012 | Belgium     | O38:H39                | ESBL, RG 2                                                                                                    |
| DSM 103246<br>(E28) | chicken<br>carcass     | 08-10-2012 | Germany     | O186:H34               | ESBL, RG 2                                                                                                    |
| DSM 103247<br>(E29) | chicken<br>carcass     | 08-10-2012 | Germany     | O88:H7                 | ESBL, RG 2                                                                                                    |
| DSM 103248<br>(E37) | chicken<br>carcass     | 08-10-2012 | France      | O162:H10               | ESBL, RG 2                                                                                                    |
| DSM 103249<br>(E43) | chicken<br>carcass     | 08-10-2012 | France      | O <sup>NT</sup> :H10   | ESBL, RG 2                                                                                                    |
| DSM 103250<br>(E50) | chicken<br>carcass     | 13-01-2014 | Netherlands | O <sup>NT</sup> :H25   | ESBL, RG 2                                                                                                    |
| DSM 103251<br>(E53) | chicken<br>carcass     | 13-01-2014 | Netherlands | O91:H7                 | ESBL, RG 2                                                                                                    |
| DSM 103254          | chicken air<br>sac     | 12-07-1999 | Germany     | O78                    | APEC; astA -, CDTIII -, CNF1/2 -,<br>FyuA -, irp2 -, hlyA -, aer +, tsh +,<br>fimC +, papC +, hlyE -, stx2f - |
| DSM 103255          | chicken<br>peritoneum  | 12-10-1999 | Germany     | O78                    | APEC; astA +, CDTIII -, CNF1/2 -,<br>FyuA +, irp2 +, hlyA -, aer +, tsh +,<br>fimC +, papC -, hlyE -, stx2f - |
| DSM 103256          | chicken                | 11- 1999   | Germany     | O2:K1                  | APEC                                                                                                          |
| DSM 103257          | chicken<br>wattle      | 11-1999    | Germany     | O2:K1                  | APEC                                                                                                          |
| DSM 103258          | chicken                | 24-02-2000 | Germany     | O2:K1                  | APEC                                                                                                          |
| DSM 103259          | chicken bone<br>marrow | 24-02-2000 | Germany     | O2                     | APEC                                                                                                          |
| DSM 103260          | chicken heart<br>blood | 10-04-2000 | Germany     | O1:H <sup>NM</sup>     | APEC; astA +, CDTIII -, CNF1/2 -,<br>FyuA +, irp2 +, hlyA -, aer +, tsh +,<br>fimC +, papC +, hlyE -, stx2f - |
| DSM 103261          | chicken                | 05-07-2001 | Germany     | O2:K1                  | APEC                                                                                                          |
| DSM 103262          | chicken                | 05-07-2001 | Germany     | O1:K1                  | APEC                                                                                                          |
| DSM 103263          | chicken heart<br>blood | 10-07-2001 | Germany     | O78:K80                | APEC; aerA+, tsh+                                                                                             |
| DSM 103264          | chicken                | 29-05-2001 | Germany     | O1:K1                  | APEC                                                                                                          |
| DSM 103265          | dove                   | 12-01-2004 | Germany     | O1:H15                 | APEC; Col-, Hly-,                                                                                             |
| DSM 103266          | chicken                | 01-03-2005 | Germany     | O2                     | APEC; astA-, iss +, irp2 +, papC -, iuc<br>D +, tsh +, vat -, cvi/cva +                                       |
| E64                 | pig farm               | 2014       | Germany     | ND                     | ND                                                                                                            |
| ECOR10              | human                  | ND         | USA         | O6:H10                 | group A strain, RG 1                                                                                          |
| ECOR13              | human                  | ND         | Sweden      | O173:H <sup>NM</sup> ; | group A strain, RG 1                                                                                          |
| ECOR17              | pig feces              | ND         | Indonesia   | O106:H <sup>NM</sup>   | group A strain; RG 1                                                                                          |
| ECOR28              | human feces            | ND         | USA         | O104:H <sup>NM</sup>   | group B1 strain; RG 1                                                                                         |
| ECOR47              | sheep                  | ND         | New Guinea  | O <sup>NT</sup> :H18   | group D strain, RG 2                                                                                          |

6     **Table S2:** Serogenotypes, resistance und virulence markers of *E. coli* strains, analyzed by PanType

|                                     | strain                      | E07                    | E08                    | E17       | E18        | E28                     | E29       | E37      | E43                           | E50                   | E53                   |
|-------------------------------------|-----------------------------|------------------------|------------------------|-----------|------------|-------------------------|-----------|----------|-------------------------------|-----------------------|-----------------------|
| Serogenotype                        | O-Serotype                  |                        |                        |           |            |                         |           |          |                               |                       | O91                   |
|                                     | H-Serotype                  | fliC H48               | fliC H48               | fliC H39  | fliC H39   | fliC H34                | fliC H7   | fliC H10 | fliC H10                      | fliC H25              | fliC H7               |
| Resistance associated genes against | Aminoglycoside -antibiotics | aadA1, aadA2           | aadA1, aadA2           | strB      | strA, strB | aadA2, aphA, strA, strB |           | strB     | aadA1, aadA2                  |                       |                       |
|                                     | β-lactam-antibiotics        | blaSHV                 | blaSHV                 | blaTEM    | blaTEM     | blaCTX-M9               | blaTEM    | blaTEM   | blaTEM, blaCTX-M9             | blaCTX-M1, blaCTX-M15 | blaCTX-M1, blaCTX-M15 |
|                                     | Chlor-amphenicol            | cmlA1                  | cmlA1                  |           |            |                         |           |          | cmlA1                         |                       |                       |
|                                     | Macrolid-antibiotics        |                        |                        |           |            |                         |           |          |                               |                       |                       |
|                                     | Tetracyclines               | tetA                   | tetA                   | tetA      | tetA       | tetB                    |           |          | tetB                          |                       |                       |
|                                     | Sulfonamide                 | sul3                   | sul3                   |           |            | sul1, sul2              |           | sul2     | sul3                          | sul2                  | sul2                  |
|                                     | Trimethoprim                |                        |                        |           |            |                         |           | dfrA14   | dfrA1                         |                       |                       |
| genes encoding virulence factors    | Adhesins                    |                        |                        |           |            |                         |           |          |                               |                       |                       |
|                                     | Fimbriae secretion system   |                        |                        |           |            | prfB                    |           |          |                               |                       | lpfA                  |
|                                     | Autotransporter             |                        |                        |           |            |                         |           |          |                               |                       |                       |
|                                     | Toxins                      | cma                    | cma                    | astA      | astA       | astA                    | astA      |          | cma, mchF                     | cma                   | cma                   |
|                                     | miscellaneous               | hemL, intI1, iroN, iss | hemL, intI1, iroN, iss | hemL, iss | hemL, iss  | hemL, ireA              | hemL, iss | hemL     | hemL, intI1, intI2, iroN, iss | hemL, ireA, iroN, iss | hemL, iroN, iss       |

7

8

|                                            | strain                                       | DSM 101102            | DSM 101104                    | DSM 101105                      | DSM 101111                      | DSM 101112                      | DSM 101113                              | DSM 101114                    | DSM 101120                    | DSM 101121                            | DSM 101122                    |
|--------------------------------------------|----------------------------------------------|-----------------------|-------------------------------|---------------------------------|---------------------------------|---------------------------------|-----------------------------------------|-------------------------------|-------------------------------|---------------------------------------|-------------------------------|
| <b>Serogenotype</b>                        | <b>O-Serotype</b>                            |                       |                               |                                 |                                 |                                 |                                         |                               |                               |                                       |                               |
|                                            | <b>H-Serotype</b>                            | fliC H6               | fliC H5                       | fliC H4                         | fliC H4                         | fliC H4                         | fliC H4                                 | fliC H4                       | fliC H4                       | fliC H1, fliC H46                     | fliC H5                       |
| <b>Resistance associated genes against</b> | <b>Aminoglycoside -antibiotics</b>           | aadA4, strA, strB     | strB                          | aadA1, aphA, aadA4              | aac6, aac6Ib, aadA4             | aac6, aac6Ib, aadA4, strA, strB | aac6, aac6Ib, aadA4                     | strA, strB, aadA4             | aadA4                         | strB                                  | strB                          |
|                                            | <b><math>\beta</math>-lactam-antibiotics</b> | blaCTX-M1, blaCTX-M15 | blaCTX-M1, blaCTX-M15, blaTEM | blaCTX-M1, blaCTX-M15, blaOXA-1 | blaCTX-M1, blaCTX-M15, blaOXA-1 | blaCTX-M1, blaCTX-M15, blaOXA-1 | blaCTX-M1, blaCTX-M15, blaOXA-1, blaTEM | blaCTX-M1, blaCTX-M15, blaTEM | blaCTX-M1, blaCTX-M15, blaTEM | blaCTX-M1, blaCTX-M15, blaTEM         | blaCTX-M1, blaCTX-M15, blaTEM |
|                                            | <b>Chlor-amphenicol</b>                      | floR                  |                               | catA1                           | catB3                           | catB3                           | catB3                                   |                               |                               |                                       |                               |
|                                            | <b>Macrolid-antibiotics</b>                  | mphA, mrx             | mphA, mrx                     |                                 | mphA, mrx                       | mphA, mrx                       | mphA, mrx                               | mphA, mrx                     | mphA, mrx                     | mphA                                  |                               |
|                                            | <b>Tetracyclines</b>                         | tetA, tetB            |                               | tetB                            | tetA                            | tetA                            |                                         | tetA                          | tetA, tetB                    | tetB                                  |                               |
|                                            | <b>Sulfonamide</b>                           | sul1, sul2            | sul2                          | sul1, sul2                      | sul1                            | sul1, sul2                      | sul1                                    | sul1, sul2                    | sul1                          | sul2                                  | sul1, sul2                    |
|                                            | <b>Trimethoprim</b>                          | dfrA17, dfrA19        |                               | dfrA7, dfrA17, dfrA19           | dfrA17, dfrA19                  | dfrA17, dfrA19                  | dfrA17, dfrA19                          | dfrA5, dfrA17, dfrA19         | dfrA17                        |                                       |                               |
| <b>genes encoding virulence factors</b>    | <b>Adhesins</b>                              |                       | iha                           |                                 | iha, nfaE                       | iha                             | iha, nfaE                               | iha                           | iha                           | iha                                   | iha                           |
|                                            | <b>Fimbriae</b>                              | prfB                  | prfB                          | lpfA                            | prfB                            | prfB                            | prfB                                    | prfB                          | prfB                          | prfB                                  | prfB                          |
|                                            | <b>secretion system</b>                      |                       |                               |                                 |                                 |                                 |                                         |                               |                               | espA_C_rod entium                     |                               |
|                                            | <b>Autotransporter</b>                       |                       | vat                           |                                 |                                 |                                 |                                         |                               |                               | pic, vat                              | vat                           |
|                                            | <b>Toxins</b>                                |                       | sat, senB                     | mcmA                            | sat                             | astA, sat, senB                 | sat                                     | cnf1, sat, senB               | sat                           | cba, cma, mchB, mchC, mchF, mcmA, sat | sat, senB                     |
|                                            | <b>miscellaneous</b>                         | hemL                  | hemL                          | hemL, intI1, ireA               | intI1, iss                      | iss                             | intI1, iss                              | iss                           | intI1                         | hemL, ireA, iroN                      | hemL                          |

9

|                                     | strain                       | DSM 101124                      | DSM 101126             | DSM 101133                    | DSM 101134        | DSM 101139                      |
|-------------------------------------|------------------------------|---------------------------------|------------------------|-------------------------------|-------------------|---------------------------------|
| Serogenotype                        | O-Serotype                   |                                 |                        |                               |                   |                                 |
|                                     | H-Serotype                   | fliC H15                        | fliC H9                | fliC H18                      | fliC H5           | fliC H6                         |
| Resistance associated genes against | Aminoglycoside - antibiotics | aadA1, aphA, strB               | aadA1                  | aadA1, aadB, ant2, strA, strB |                   | aac6, aac6Ib, aadA4             |
|                                     | β-lactam-antibiotics         | blaCTX-M1, blaCTX-M15, blaOXA-2 | blaCTX-M1, blaCTX-M15  | blaCTX-M1, blaCTX-M15, blaTEM | blaTEM            | blaCTX-M1, blaCTX-M15, blaOXA-1 |
|                                     | Chloramphenicol              |                                 |                        | catA1, floR                   |                   | catA1, catB3                    |
|                                     | Macrolid-antibiotics         | mphA, mrx                       |                        |                               | mphA, mrx         | mphA, mrx                       |
|                                     | Tetracyclines                | tetA                            |                        | tetA                          | tetB              | tetA, tetB                      |
|                                     | Sulfonamide                  | sul1, sul2                      | sul1, sul2             | sul1, sul2                    |                   | sul1                            |
|                                     | Trimethoprim                 | dfrA1                           | dfrA1                  |                               | dfrA1             | dfrA17                          |
| genes encoding virulence factors    | Adhesins                     |                                 |                        |                               | iha               |                                 |
|                                     | Fimbriae                     |                                 | lpfA                   |                               | prfB              |                                 |
|                                     | secretion system             |                                 |                        |                               |                   |                                 |
|                                     | Autotransporter              |                                 | tsh                    | espP                          | vat               |                                 |
|                                     | Toxins                       |                                 | ccl, mchF              | astA, toxB                    | sat, senB         |                                 |
|                                     | miscellaneous                | hemL, intI1                     | hemL, intI1, iroN, iss | hemL, intI1, iss              | hemL, intI2, ireA | hemL, iss                       |

10

11

12 **Table S3:** Phages used in this study

| phage         | strain for isolation | strain for propagation | origin        | geographical origin | time of isolation |
|---------------|----------------------|------------------------|---------------|---------------------|-------------------|
| G28           | E28                  | K12                    | manure        | Hamel, Germany      | Aug 2016          |
| AB27          | E53                  | ECOR-47                | manure        | Hamel, Germany      | Jan 2015          |
| KRA2          | DH5 $\alpha$         | MG1655                 | surface water | Portici, Italy      | Apr 2008          |
| EW2           | DH5 $\alpha$         | MG1655                 | surface water | Hamm, Germany       | Aug 2013          |
| TB49          | E64                  | ECOR-13                | manure        | Hamel, Germany      | Aug 2014          |
| TriM          | ECOR-17              | ECOR-28                | manure        | Hamel, Germany      | Mar 2016          |
| T4 (DSM 4505) |                      | DSM 613                |               |                     |                   |

13

14 **Table S4:** Contents of antibiotic discs used for susceptibility testing

| substance                 | disc content |
|---------------------------|--------------|
| penicillin G              | 10 IE        |
| oxacillin                 | 5 $\mu$ g    |
| ampicillin                | 10 $\mu$ g   |
| ticarcillin               | 75 $\mu$ g   |
| mezlocillin               | 30 $\mu$ g   |
| cefalotin                 | 30 $\mu$ g   |
| cefazolin                 | 30 $\mu$ g   |
| cefotaxime                | 30 $\mu$ g   |
| imipenem                  | 10 $\mu$ g   |
| tetracycline              | 30 $\mu$ g   |
| chloramphenicol           | 30 $\mu$ g   |
| gentamicin                | 10 $\mu$ g   |
| amikacin                  | 30 $\mu$ g   |
| vancomycin                | 30 $\mu$ g   |
| aztreonam                 | 30 $\mu$ g   |
| erythromycin              | 15 $\mu$ g   |
| lincomycin                | 15 $\mu$ g   |
| ofloxacin                 | 5 $\mu$ g    |
| norfloxacin               | 10 $\mu$ g   |
| colistin                  | 10 $\mu$ g   |
| pipemidic acid            | 20 $\mu$ g   |
| nitrofurantoin            | 100 $\mu$ g  |
| bacitracin                | 10 IE        |
| polymyxin B               | 300 IE       |
| kanamycin                 | 30 $\mu$ g   |
| neomycin                  | 30 $\mu$ g   |
| doxycycline               | 30 $\mu$ g   |
| ceftriaxone               | 30 $\mu$ g   |
| clindamycin               | 10 $\mu$ g   |
| fosfomicin                | 50 $\mu$ g   |
| moxifloxacin              | 5 $\mu$ g    |
| linezolid                 | 30 $\mu$ g   |
| nystatin                  | 100 IE       |
| teicoplanin               | 30 $\mu$ g   |
| quinupristin/dalfopristin | 15 $\mu$ g   |
| piperacillin-tazobactam   | 40 $\mu$ g   |

Table S5: Mean dimensions of phage particles with SD

| phage | head width [nm] | head length [nm] | tail length [nm] |
|-------|-----------------|------------------|------------------|
| EW2   | 78 ± 3          | 80 ± 3           | 114 ± 6          |
| AB27  | 87 ± 1          | 94 ± 4           | 96 ± 3           |
| TB49  | 84 ± 3          | 114 ± 3          | 107 ± 3          |
| TriM  | 49 ± 1          | 108 ± 1          | 94 ± 1           |
| KRA2  | 84 ± 3          | 95 ± 3           | 109 ± 3          |
| G28   | 89 ± 5          | 118 ± 5          | 107 ± 3          |

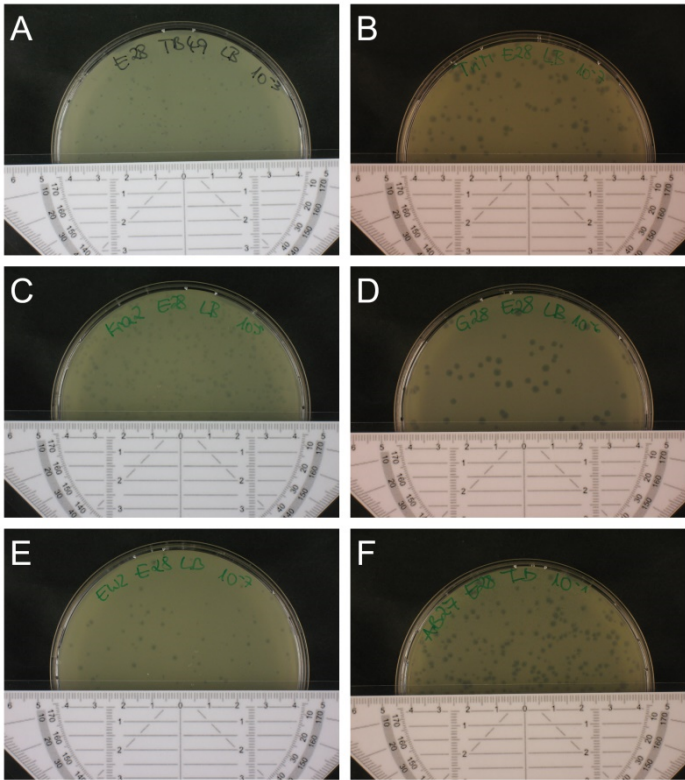

Figure S1: Plaque morphology of coliphages on E28. A) TB49, B) TriM, C) KRA2, D) G28, E) EW2 and F) AB27

Table S6: The percentage amount of strains lysed by each phage

|                                  | phages |     |      |     |      |      | total |
|----------------------------------|--------|-----|------|-----|------|------|-------|
|                                  | TB49   | G28 | KRA2 | EW2 | AB27 | TriM |       |
| % of lysed strains               | 50     | 29  | 21   | 15  | 18   | 12   | 67    |
| % of lysed clinical isolates     | 53     | 33  | 8    | 5   | 15   | 3    | 70    |
| % of lysed isolates from poultry | 20     | 20  | 30   | 30  | 10   | 20   | 30    |
| % of lysed APEC strains          | 54     | 8   | 38   | 15  | 15   | 38   | 77    |

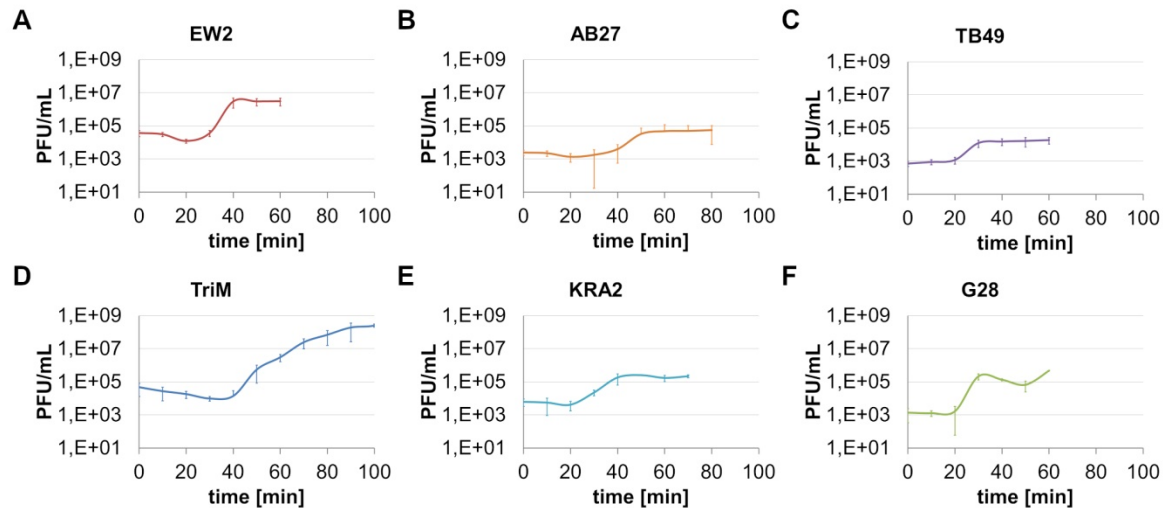

**Figure S2:** Growth of coliphages. One-step growth experiments of phage EW2 (A), AB27 (B), TB49 (C), TriM (D), KRA2 (E) and G28 (F) using *E. coli* E28 as host strain. Each experiment was performed three times with duplicate determinations. Error bars represent standard deviation of the mean.

**Table S7:** Growth of coliphages.

| phage    | 10°C    | 20°C    | 42°C    | microaerophilic | average burst size         | latent period |
|----------|---------|---------|---------|-----------------|----------------------------|---------------|
|          |         |         |         |                 | [new phage particles/cell] | [min]         |
| EW2      | np      | np      | 2.0E+00 | 1.9E+00         | 46                         | 25            |
| AB27     | np      | 1.3E-02 | 5.1E+00 | 5.7E-01         | 6                          | 35            |
| TB49     | np      | 6.0E+00 | 3.1E-01 | 6.0E+00         | 7                          | 20            |
| TriM     | np      | np      | 1.0E+00 | 1.1E+00         | 190                        | 40            |
| KRA2     | np      | 5.5E-03 | 5.0E+00 | 2.0E+00         | 32                         | 20            |
| G28      | 1,5E-02 | 4.0E-01 | 1.3E+00 | 1.7E+00         | 80                         | 20            |
| Cocktail | np      | 1.6E-03 | 1.4E+00 | 6.3E+00         |                            |               |

Efficiency of plating of individual phages and the combination of the six phages (cocktail) under different growth conditions in comparison to standard conditions (37°C, aerobic, EOP = 1) and summary of burst sizes and latent periods (np = no plaques).



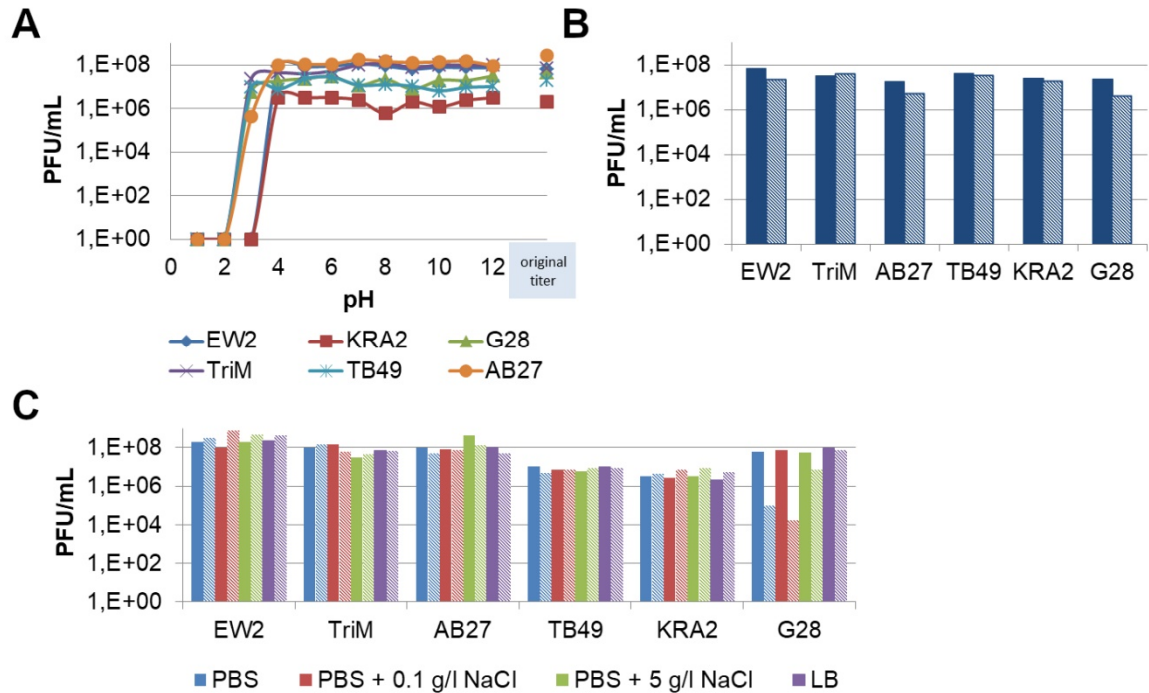

**Figure S3:** Stability of phages stored under different conditions. (A) The pH stability of phages after 1 h at 37°C in LB medium; (B) The titer of phages at time zero (filled bars) and after 24 hours (dashed bars) at 20°C in LB medium (pH 7); (C) Titer of phages at time zero (filled bars) and after 6 weeks (dashed bars) at 6°C in PBS buffer supplemented with different NaCl concentrations and LB medium. The means of duplicate determinations are shown.

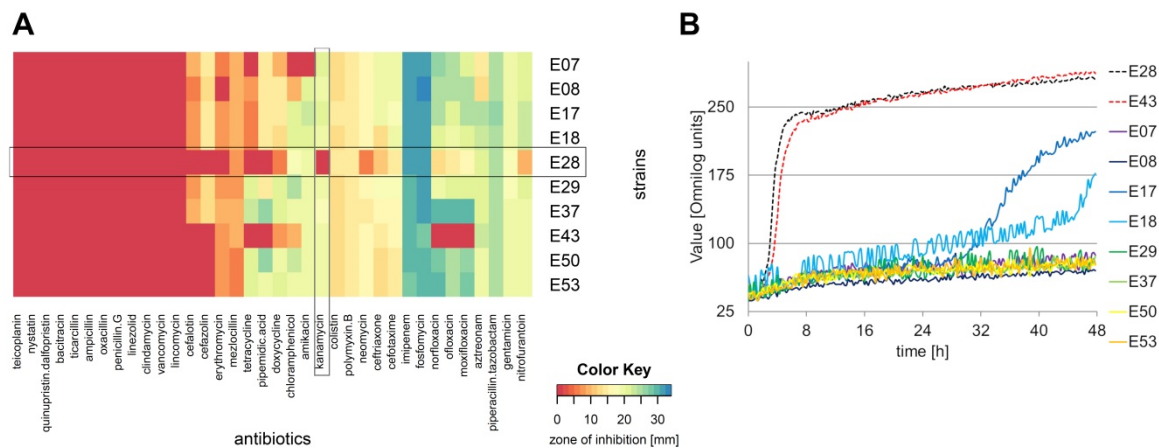

**Figure S4:** Antibiotic resistance patterns and resistance against potassium tellurite of 10 ESBL-producing *E. coli* isolates. (A) The susceptibility of ESBL-producing *E. coli* isolates to 36 different antibiotics is displayed as a heatmap. The color code of the heatmap is given in the bottom right corner. (B) Metabolic activity in the presence of potassium tellurite was measured using Gen III Microplates. For complete results see Figure S1.

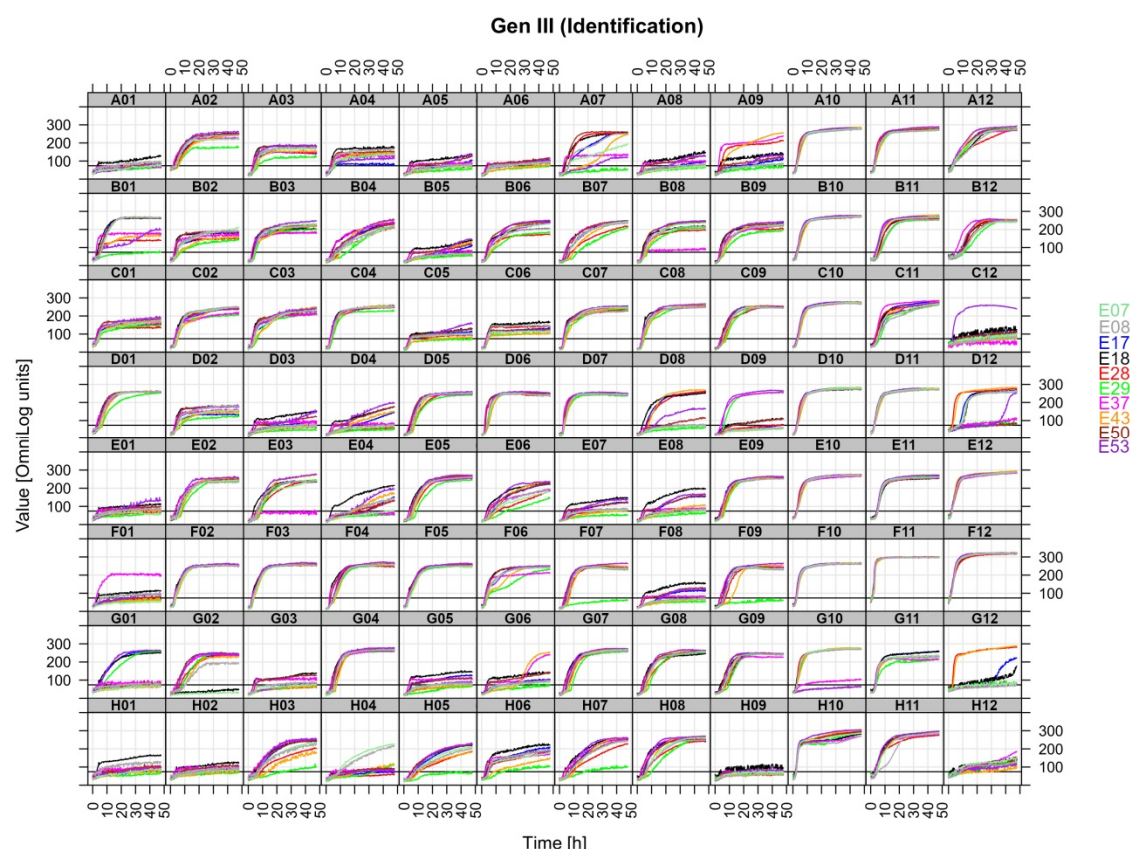

**Figure S5:** Results of the phenotypic array using Gen III Microplates. A01 (Negative Control), A02 (Dextrin), A03 (D-Maltose), A04 (D-Trehalose), A05 (D-Cellobiose), A06 (Gentiobiose), A07 (Sucrose), A08 (Turanose), A09 (Stachyose), A10 (Positive Control), A11 (pH 6), A12 (pH 5), B01 (D-Raffinose), B02 ( $\alpha$ -D-Lactose), B03 (D-Melibiose), B04 ( $\beta$ -Methyl-D-Glucoside), B05 (D-Salicin), B06 (N-Acetyl-D-Glucosamine), B07 (N-Acetyl- $\beta$ -D-Mannosamine), B08 (N-Acetyl-D-Galactosamine), B09 (N-Acetyl-Neuraminic Acid), B10 (1% NaCl), B11 (4% NaCl), B12 (8% NaCl), C01 ( $\alpha$ -D-Glucose), C02 (D-Mannose), C03 (D-Fructose), C04 (D-Galactose), C05 (3-Methyl Glucose), C06 (D-Fucose), C07 (L-Fucose), C08 (L-Rhamnose), C09 (Inosine), C10 (1% Sodium Lactate), C11 (Fusidic Acid), C12 (D-Serine 2), D01 (D-Sorbitol), D02 (D-Mannitol), D03 (D-Arabitol), D04 (myo-Inositol), D05 (Glycerol), D06 (D-Glucose-6-Phosphate), D07 (D-Fructose-6-Phosphate), D08 (D-Aspartic Acid), D09 (D-Serine 1), D10 (Troleandomycin), D11 (Rifamycin SV), D12 (Minocycline), E01 (Gelatin), E02 (Glycyl-L-Proline), E03 (L-Alanine), E04 (L-Arginine), E05 (L-Aspartic Acid), E06 (L-Glutamic Acid), E07 (L-Histidine), E08 (L-Pyroglutamic Acid), E09 (L-Serine), E10 (Lincomycin), E11 (Guanidine Hydrochloride), E12 (Niaproof 4), F01 (Pectin), F02 (D-Galacturonic Acid), F03 (L-Galactonic Acid - Lactone), F04 (D-Gluconic Acid), F05 (D-Glucuronic Acid), F06 (Glucuronamide), F07 (Mucic Acid), F08 (Quinic Acid), F09 (D-Saccharic Acid), F10 (Vancomycin), F11 (Tetrazolium Violet), F12 (Tetrazolium Blue), G01 (p-Hydroxy-Phenylacetic Acid), G02 (Methyl Pyruvate), G03 (D-Lactic Acid Methyl Ester), G04 (L-Lactic Acid), G05 (Citric Acid), G06 ( $\alpha$ -Keto-Glutaric Acid), G07 (D-Malic Acid), G08 (L-Malic Acid), G09 (Bromo-Succinic Acid), G10 (Nalidixic Acid), G11 (Lithium Chloride), G12 (Potassium Tellurite), H01 (Tween 40), H02 ( $\gamma$ -Amino-n-Butyric Acid), H03 ( $\alpha$ -Hydroxy-Butyric Acid), H04 ( $\beta$ -Hydroxy-Butyric Acid), H05 ( $\alpha$ -Keto-Butyric Acid), H06 (Acetoacetic Acid), H07 (Propionic Acid), H08 (Acetic Acid), H09 (Formic Acid), H10 (Aztreonam), H11 (Sodium Butyrate), H12 (Sodium Bromate).

**Table S8:** Average SD corresponding to Fig 3 (Efficacy of bacteriophages and phage combinations in inhibiting the growth of *E. coli* E28)

|                              | LB    | E28   | AB27  | EW2   | G28   | KRA2  | TB49  | TriM  |
|------------------------------|-------|-------|-------|-------|-------|-------|-------|-------|
| average SD of OD 600nm 0-24h | 0,008 | 0,007 | 0,008 | 0,248 | 0,004 | 0,041 | 0,032 | 0,017 |

  

|                              | LB    | E28   | 4 φ 4E6 | 4 φ 4E4 | 4 φ 4E2 | 4 φ 4E0 | 6 φ 4E6 | 6 φ 4E4 | 6 φ 4E2 | 6 φ 4E0 |
|------------------------------|-------|-------|---------|---------|---------|---------|---------|---------|---------|---------|
| average SD of OD 600nm 0-24h | 0,008 | 0,007 | 0,009   | 0,008   | 0,015   | 0,125   | 0,003   | 0,003   | 0,004   | 0,055   |

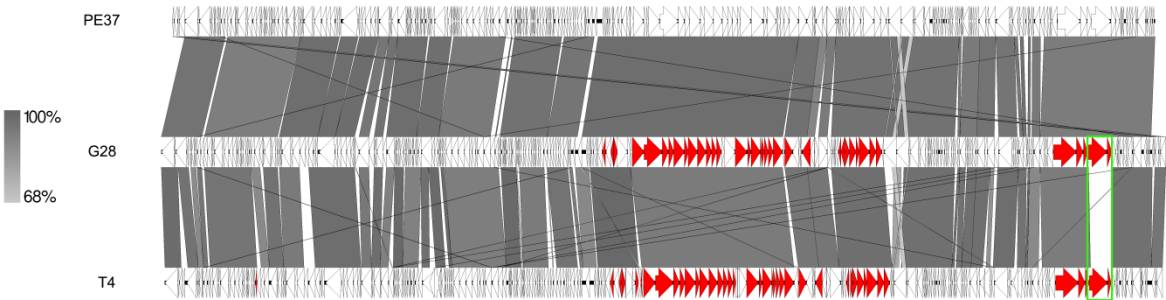

**Figure S6:** Genome structure of phage G28 in comparison to the related phages PE37 and T4. A synteny plot was generated using Easyfig [52] with nucleotide sequence comparison. The genome of PE37 was reversed for a better comparability. Genes for structural components are marked in red. The genes encoding a putative tail fiber tip are framed in green. The identity range is indicated by the gradient scale.

**Table S9:** Comparison of metabolic activity of phage-resistant variants and the wild type strain.

| Carbon source                  | E28.WT | E28.AB27R2 | E28.EW2R3 | E28.G28R3 | E28.KRA2R3 | E28.TB49R2c | E28.TrIMR3 |
|--------------------------------|--------|------------|-----------|-----------|------------|-------------|------------|
| Water                          | -      | 0          | 0         | 0         | 0          | 0           | 0          |
| $\alpha$ -Cyclodextrin         | -      | 0          | 0         | 0         | 0          | 0           | 0          |
| Dextrin                        | +      | 0          | 0         | -1        | 0          | -1          | 0          |
| Glycogen                       | -      | 0          | 0         | 0         | 0          | 0           | 0          |
| Tween 40                       | -      | 0          | 0         | 0         | 0          | 0           | 0          |
| N-Acetyl-D-galactosamine       | +      | 0          | 0         | -2        | 0          | -2          | 0          |
| N-Acetyl-D-glucosamine         | +      | 0          | 0         | -1        | 0          | -1          | 0          |
| Adonitol                       | -      | 0          | 0         | 0         | 0          | 0           | 0          |
| L-Arabinose                    | +      | 0          | 0         | -1        | 0          | -1          | 0          |
| D-Arabitol                     | -      | 0          | 0         | 0         | 0          | 0           | 0          |
| D-Cellobiose                   | -      | 0          | 0         | 0         | 0          | 0           | 0          |
| i-Erythritol                   | -      | 0          | 0         | 0         | 0          | 0           | 0          |
| D-Fructose                     | +      | -1         | 0         | +1        | 0          | +1          | 0          |
| L-Fucose                       | +      | 0          | 0         | -1        | 0          | -1          | 0          |
| D-Galactose                    | +      | 0          | 0         | -1        | 0          | -1          | 0          |
| $\alpha$ -D-Glucose            | +      | 0          | 0         | +1        | 0          | +1          | 0          |
| m-Inositol                     | -      | 0          | 0         | 0         | 0          | 0           | 0          |
| $\alpha$ -D-Lactose            | +      | 0          | +1        | +1        | 0          | +1          | 0          |
| Lactulose                      | +      | 0          | 0         | -2        | 0          | -2          | 0          |
| Maltose                        | +      | 0          | 0         | -2        | 0          | -2          | 0          |
| D-Mannitol                     | +      | 0          | 0         | +1        | 0          | +1          | 0          |
| D-Mannose                      | +      | 0          | 0         | +1        | 0          | +1          | 0          |
| D-Melibiose                    | +      | 0          | 0         | +1        | 0          | +1          | 0          |
| $\beta$ -Methyl-D-Glucoside    | +      | 0          | 0         | -1        | 0          | -1          | 0          |
| D-Raffinose                    | +      | 0          | 0         | 0         | 0          | -1          | 0          |
| L-Rhamnose                     | +      | 0          | 0         | -1        | 0          | -1          | 0          |
| D-Sorbitol                     | +      | 0          | 0         | -1        | 0          | -1          | 0          |
| Sucrose                        | +      | 0          | 0         | 0         | 0          | -1          | 0          |
| D-Trehalose                    | +      | -1         | 0         | +1        | 0          | +1          | 0          |
| Xylitol                        | -      | 0          | 0         | 0         | 0          | 0           | 0          |
| Methyl Pyruvate                | +      | 0          | 0         | -1        | 0          | -1          | 0          |
| Mono-Methyl-Succinate          | +      | 0          | 0         | 0         | 0          | 0           | 0          |
| Acetic Acid                    | +      | 0          | 0         | -1        | 0          | -1          | 0          |
| Cis-AconiticAcid               | -      | 0          | 0         | 0         | 0          | 0           | 0          |
| Citric Acid                    | -      | 0          | 0         | 0         | 0          | 0           | 0          |
| D-Galactonic Acid Lactone      | -      | 0          | 0         | 0         | 0          | 0           | 0          |
| D-Galacturonic Acid            | +      | 0          | 0         | -1        | 0          | -1          | 0          |
| D-Gluconic Acid                | +      | 0          | 0         | -1        | 0          | -1          | 0          |
| D-Glucosaminic Acid            | -      | 0          | 0         | 0         | 0          | 0           | 0          |
| D-Glucuronic Acid              | +      | -2         | 0         | -1        | 0          | -1          | 0          |
| $\alpha$ -Hydroxy Butyric Acid | +      | 0          | 0         | 0         | 0          | 0           | 0          |
| $\beta$ -Hydroxy Butyric Acid  | -      | 0          | 0         | 0         | 0          | 0           | 0          |
| $\gamma$ -Hydroxy Butyric Acid | -      | 0          | 0         | 0         | 0          | 0           | 0          |
| p-Hydroxy Phenylacetic Acid    | -      | 0          | 0         | 0         | 0          | 0           | 0          |
| Itaconic Acid                  | -      | 0          | 0         | 0         | 0          | 0           | 0          |
| $\alpha$ -Keto Butyric Acid    | +      | 0          | 0         | 0         | 0          | 0           | 0          |
| $\alpha$ -Keto Glutaric Acid   | +      | 0          | 0         | -2        | 0          | -2          | 0          |
| $\alpha$ -Keto Valeric Acid    | -      | 0          | 0         | 0         | 0          | 0           | 0          |

|                          |   |    |   |    |   |    |   |
|--------------------------|---|----|---|----|---|----|---|
| D,L-Lactic Acid          | + | 0  | 0 | -1 | 0 | -1 | 0 |
| Malonic Acid             | - | 0  | 0 | 0  | 0 | 0  | 0 |
| Propionic Acid           | + | 0  | 0 | -2 | 0 | -2 | 0 |
| Quinic Acid              | - | 0  | 0 | 0  | 0 | 0  | 0 |
| D-Saccharic Acid         | + | 0  | 0 | -2 | 0 | -2 | 0 |
| Sebacic Acid             | - | 0  | 0 | 0  | 0 | 0  | 0 |
| Succinic Acid            | + | 0  | 0 | -1 | 0 | -1 | 0 |
| Bromo Succinic Acid      | + | 0  | 0 | -1 | 0 | -1 | 0 |
| Succinamic Acid          | - | 0  | 0 | 0  | 0 | 0  | 0 |
| Glucuronamide            | + | -2 | 0 | 0  | 0 | -1 | 0 |
| D-Alanine                | + | 0  | 0 | -2 | 0 | -2 | 0 |
| L-Alanine                | + | 0  | 0 | -2 | 0 | -2 | 0 |
| L-Alanylglycine          | + | 0  | 0 | -2 | 0 | -2 | 0 |
| L-Asparagine             | + | 0  | 0 | -1 | 0 | -1 | 0 |
| L-Aspartic Acid          | + | 0  | 0 | -1 | 0 | -1 | 0 |
| L-GlutamicAcid           | - | 0  | 0 | 0  | 0 | 0  | 0 |
| Glycyl-L-AsparticAcid    | + | 0  | 0 | -2 | 0 | -2 | 0 |
| Glycyl-L-GlutamicAcid    | + | 0  | 0 | -2 | 0 | -2 | 0 |
| Hydroxy-L- proline       | - | 0  | 0 | 0  | 0 | 0  | 0 |
| L-Leucine                | - | 0  | 0 | 0  | 0 | 0  | 0 |
| L-Phenylalanine          | - | 0  | 0 | 0  | 0 | 0  | 0 |
| L-Proline                | + | 0  | 0 | +1 | 0 | +1 | 0 |
| L-Pyroglutamic Acid      | - | 0  | 0 | 0  | 0 | 0  | 0 |
| D-Serine                 | - | 0  | 0 | 0  | 0 | 0  | 0 |
| L-Serine                 | + | 0  | 0 | -1 | 0 | -1 | 0 |
| D,L-Carnitine            | - | 0  | 0 | 0  | 0 | 0  | 0 |
| γ-Amino ButyricAcid      | - | 0  | 0 | 0  | 0 | 0  | 0 |
| Urocanic Acid            | - | 0  | 0 | 0  | 0 | 0  | 0 |
| Inosine                  | + | 0  | 0 | -1 | 0 | -1 | 0 |
| Uridine                  | + | 0  | 0 | -1 | 0 | -1 | 0 |
| Thymidine                | + | 0  | 0 | -1 | 0 | -1 | 0 |
| Phenyethylamine          | - | 0  | 0 | 0  | 0 | 0  | 0 |
| Putrescine               | - | 0  | 0 | 0  | 0 | 0  | 0 |
| 0-Aminoethanol           | - | 0  | 0 | 0  | 0 | 0  | 0 |
| 0,3-Butanediol           | - | 0  | 0 | 0  | 0 | 0  | 0 |
| Glycerol                 | + | 0  | 0 | -1 | 0 | -1 | 0 |
| D,L-α-Glycerol Phosphate | + | 0  | 0 | -2 | 0 | -2 | 0 |
| Glucose--1- Phosphate    | + | 0  | 0 | -1 | 0 | -1 | 0 |
| Glucose-6- Phosphate     | + | 0  | 0 | -1 | 0 | -1 | 0 |

Metabolic activity of phage-resistant variants was compared with that of *E. coli* E28 wild type (WT) for different carbon sources. Thereby “-” indicates no metabolic activity and “+” metabolic activity of E28 WT. Metabolic activity of phage-resistant variants was classed as follows: same as E28 WT “0”, lower than E28 WT “-1”, absent (in cases where E28 showed metabolic activity) “-2”, higher than E28 WT “+1”.

## Supplemental methods:

### 2.2. Phage isolation, purification and propagation

After centrifugation, samples were filtrated (membrane syringe filter 0.45 µm, Sartorius, Germany), mixed with equal amounts of double concentrated LB broth and 1/20 volume of the logarithmic growing host strain. After incubation at 37 °C overnight, cells were sedimented by centrifugation at 8000 rpm (Biofuge primo R with rotor 7588 (Thermo Fisher Scientific, Waltham, Massachusetts, USA)) and the supernatant was filtrated. To isolate phages, appropriate dilutions of the enrichment were mixed with soft-agar (2.5% Miller's LB Broth Base™ powder (Invitrogen, Thermo Fisher Scientific, Waltham, Massachusetts, USA) 0.3% agar bacteriological No. 1 (w/v) (OXOID™, Thermo Fisher Scientific, Waltham, Massachusetts, USA) containing the corresponding host and overlaid on an agar plate. After incubation at 37 °C for 12-18 h, single plaques were suspended in SM buffer (100 mM NaCl, 8 mM MgSO<sub>4</sub>, 50 mM Tris-HCl, pH 7.5 (Merck, Darmstadt, Germany)) using a pipette tip, followed by streaking out of the suspension on a double layer agar plate. At least four consecutive single plaque isolations were performed in order to generate a pure phage preparation, which was used for further propagation. The first lysate was produced using the isolation strain. For further production of all lysates we selected different strains for all phages. The optimal production strain for each phage was defined as the strain, with which the highest titer could be achieved (**Table S3**). In general, exponentially growing cultures were infected with phages at MOI (multiplicity of infection) 0.1, incubated for 10 min at room temperature and then at 37 °C with agitation at 123 rpm until lysis was completed or, in the absence of observable lysis, for 5 h. After centrifugation and filtration, the titer of the lysate was determined using the agar overlay method using E28 as host strain. The lysates were stored at 10 °C.

### 2.3. Morphology of phages and analysis of phage bacteria interactions

To analyze phage morphology, phages were allowed to adsorb onto thin carbon support films, which were prepared by sublimation of a carbon thread onto a freshly cleaved mica surface. Phages were negatively stained with 2% (w/v) aqueous uranyl acetate, pH 5.0. Samples were examined in a Zeiss EM 910 or Zeiss Libra120 Plus transmission electron microscope (Carl Zeiss, Oberkochen, Germany) at an acceleration voltage of 80 kV/120 kV and images were recorded digitally with a Slow-Scan CCD-Camera (1K ProScan/ 2K Sharp eye) with ITEM-Software (Olympus Soft Imaging Solutions, Münster, Germany). Size determination was performed from 6-10 different phages.

For FESEM bacteria and phages were fixed with 2% glutaraldehyde and 5% formaldehyde after incubation at MOI 5. Cells were centrifuged and the pellet was washed with TE-buffer (20 mM Tris, 1 mM EDTA, pH 6.9 (Merck, Darmstadt Germany), placed onto poly-L-lysine coated cover slips (12 mm in diameter) and dehydrated in a graded series of acetone (10, 30, 50, 70, 90, 100%) on ice for 15 min for each step, critical-point dried with liquid CO<sub>2</sub> (CPD 30, Bal-Tec, Balzers Liechtenstein) and covered with a gold-palladium film by sputter coating (SCD 500, Bal-Tec, Balzers Liechtenstein) before being examined in a field emission scanning electron microscope Merlin (Carl Zeiss, Oberkochen, Germany) using the Everhart Thornley SE detector and the inlens detector in a 25:75 ratio at an acceleration voltage of 5 kV.

The bacteriophage adsorption assay was performed as follows: *E. coli* cells (E28 and E28.G28R3) were grown in LB medium at 37 °C and agitation at 123 rpm for 2 h. 20 mL culture with a cell density of 2x10<sup>8</sup> CFU/mL was prepared and phage G28 was added at a MOI of 0.1, aliquoted in 1.5 mL tubes and incubated at 37 °C in a Thermomix (Eppendorf, Hamburg, Germany). At indicated time points after phage addition an aliquot was taken, centrifuged at 8000 rpm (Biofuge primo R with rotor 7588 (Thermo Fisher Scientific, Waltham, Massachusetts, USA)) and the supernatant directly diluted in LB medium. The number of free phage particles was determined by double agar overlay with E28. Equal amounts of LB medium and phages without bacterial cells treated in the same way were used as a

control. Adsorption assays were performed three times independently and data points represent the mean and SD of triplicate measurements.

## 2.5. One-step growth assays

Exponentially growing cells of E28 were adjusted to  $2 \times 10^8$  CFU/mL with LB medium and infected with one of the phages EW2, AB27, TB49, TriM, KRA2 or G28 at MOI of 0.001 to ensure that a single bacterium is infected by only one phage particle. After adsorption for 10 min at room temperature cultures were centrifuged, the bacterial pellet was suspended in the initial volume of fresh LB medium and incubated at 37 °C for up to 100 min. This was done to avoid adsorption of residual free phages. At indicated time points, plaque assays were performed to enumerate viable phages in duplicate determinations. The latent period was measured as the time interval between the end of adsorption and the initial rise in phage titer. The average burst size was calculated by subtracting the titer at the end of the latent period from the maximum after the burst, divided by the number of infected bacterial cells. Data are presented as mean with standard deviation (SD) of three independent experiments.

## 2.9. *In vitro* biofilm model

Overnight cultures of *E. coli*, grown in LB, were adjusted to an optical density at 600 nm of 0.1 and then diluted 1:10 in fresh LB. All biofilm experiments were done in 96-well polystyrene microplates. The phage preparation used consisted of EW2, AB27, TB49, TriM, KRA2 and G28 mixed in equal parts at a concentration of  $1 \times 10^6$  PFU/mL. Wells were filled 190 µL of the bacterial culture and 10 µL of the phage preparation. Wells serving as positive controls, were filled with 190 µL of the adjusted bacterial culture and 10 µL LB, wells that served as negative controls were filled with 200 µL LB only. The microplates were then incubated for 48 h at 37 °C and 120 rpm shaking.

To study the effect of the bacteriophage preparation on already established biofilms, the latter were grown for 24 h at 37 °C and 120 rpm shaking. Then all wells were washed twice with PBS to remove non-adhered bacteria. The experimental wells were then refilled with 190 µL LB and 10 µL of the phage preparation described above. The microplates were then incubated for a second 24 h at 37 °C and 120 rpm shaking.

After 48 h, all wells were washed twice with PBS and then refilled with 200 µL of PBS. To determine viable cells, the biofilms were mechanically resuspended using a pipette tip and analysed on agar plates.

## 2.13. DNA isolation from phages

300 mL high titer lysate ( $10^{10}$  PFU/mL) (see 2.3.) was precipitated with 10 % polyethylene glycol 8000 and 1 M sodium chloride (both Merck, Darmstadt, Germany) followed by centrifugation for 30 min at 10000 rpm (Sorvall RC 6 Plus with rotor F10-6x500y, Thermo Fisher Scientific, Waltham, Massachusetts, USA). The pellet was resuspended in 2- 4 mL SM-buffer and treated with 10fold reaction buffer (100 mM Tris-HCl (pH 7.5), 25 mM MgCl<sub>2</sub> und 1 mM CaCl<sub>2</sub>), 0.2 mg/mL RNase A and 0.002 U/µL DNase I (all Thermo Fisher Scientific, Waltham, Massachusetts, USA) followed by incubation overnight at 37 °C and 300 rpm in a Thermomixer (Eppendorf, Germany). DNA was isolated using phenol-chloroform extraction and precipitated by 3 M sodium acetate and 100% ethanol. After incubation for 15 min at -80 °C, DNA was pelleted by centrifugation and washed twice with 70% ethanol. The pellet was air-dried and solved in 50- 200 µL TE-buffer (10 mM Tris-HCl, 1 mM EDTA, pH 8, Merck, Darmstadt Germany). The concentration was determined using the Qubit® dsDNA HS Assay Kit (Thermo Fisher Scientific, Waltham, Massachusetts, USA) following the manufacturer's instructions.

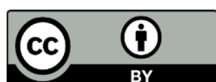

Supplement: s1 [file s1]
